# Supplementary material for: Mutations Selected After Exposure to Bacteriocin Lcn972 Activate a Bce-Like Bacitracin Resistance Module in Lactococcus lactis
Source: Front Microbiol. 2020 Aug 13;11:1805. doi: 10.3389/fmicb.2020.01805 (PMC7438565; doi:10.3389/fmicb.2020.01805)
Supplement: Supplementary file 1 [file Table_1.XLSX]

## Sheet: Hoja1
Supplementary Table 1. Primers used in this work
Primer	Sequence	Position and use
NcoIysaCB-F	GAGAAAACCATGGTACTCGAAGTAAAACATCTC	5' ysaC, cloning ysaCB
ysaDRca	GAAACATCATGAAAAAAATACTTTTTGGAA	5' ysaD, cloning ysaDCB
BamHIysaCB-R	GAGGCATATGGATCCCTTCTTTTTTATC	3' ysaB, cloning ysaCB and ysaDCB
ysaDPf	GGAATTCGTTACAAAAAGCGCTTGT	5' promoter ysaD, cloning in pPTPL
PysaDfPstI	CGCTGCAGCCAGTTACAAAAAGC	5' promoter ysaD, cloning in pRCR
ysaDPr	GCTCTAGATGATAAGTGCTATTATTCC	3' promoter ysaD, cloning in pPTPL and pRCR
ysaD-tF	TATGGCAGACCACAATCTCC	Intragenic ysaD, RT-qPCR, RT-PCR ysaDC
ysaD-R	GGGCTTCTTTAGGAACCTCTG	Intragenic ysaD, RT-qPCR
ysaC-qF	ACGTGCCTTGATTAGCCAAC	Intragenic ysaC, RT-qPCR
ysaC-qR	GGCTTGCAGCTAAACTTGAGTG	Intragenic ysaC, RT-qPCR
ysaB-qF	GCAAATGCTGTTGGTCTAGG	Intragenic ysaB, RT-qPCR
ysaB-qR	TGCTTCTCGGGTATAGTAGG	Intragenic ysaB, RT-qPCR
ysaA-qF	TCCTCCTGTGAGTGAAGTAG	Intragenic ysaA, RT-qPCR
ysaA-qR	TTAGAGCTGCAAGCCAAG	Intragenic ysaA, RT-qPCR
llrG-qF	ACCGCTATGAATCAAGGAGCTG	Intragenic llrG, RT-qPCR
llrG-qR	GCTCAATTTCTTCGCGTTCACC	Intragenic llrG, RT-qPCR, RT-PCR ysaAllrG
kinG-qF	CTTGCTGAGCGTGAAATGGAAG	Intragenic kinG, RT-qPCR
kinG-qR	TTCATCTGGTGCGACCAGAC	Intragenic kinG, RT-qPCR
Tuf-F	GGTAGTTGTCGAAGAATGGAGTGTGA	RT-qPCR reference
Tuf-R	TAAACCAGGTTCAATCACTCCACACA	RT-qPCR reference
ysaC-tR	TTCGCCTTCTTCTACACC	intragenic ysaC, RT-PCR ysaDC
ysaC-tF	TTCTTGGGAGCATCAGAG	intragenic ysaC, RT-PCR ysaCB
ysaB-tR	TGCTGTGGGACTAATGAC	intragenic ysaB, RT-PCR ysaCB
ysaB-tF	GCAACGAGTCGTGTTTAC	intragenic ysaB, RT-PCR ysaBA
ysaA-tR	GGCATAAGCGCAAATGAG	intragenic ysaA, RT-PCR ysaBA
ysaA-tF	GTGAGTGATACAGAAATGATAGC	intragenic ysaA, RT-PCR ysaAllrG
kinG-tF	GGGACGTCTGTGACAATAAC	Intragenic kinG, RT-PCR kinGtyrA
tyrA-tR	TATCTGCCGCCATTACTC	Intragenic tyrA, RT-PCR kinGtyrA
