# Supplementary material for: Mutations Selected After Exposure to Bacteriocin Lcn972 Activate a Bce-Like Bacitracin Resistance Module in Lactococcus lactis
Source: Front Microbiol. 2020 Aug 13;11:1805. doi: 10.3389/fmicb.2020.01805 (PMC7438565; doi:10.3389/fmicb.2020.01805)
Supplement: Supplementary file 2 [file Table_2.XLSX]

## Sheet: Hoja1
Supplementary Table 2. Comparison of the Ysa and the two component system G proteins from L. lactis strains according to BLASTp (https://blast.ncbi.nlm.nih.gov/Blast.cgi)
		YsaD (119 aa)					YsaC (259 aa)					YsaB (667 aa)
	L. lactis	Accesion	Identities	Positives	e value		Accesion	Identities	Positives	e value		Accesion	Identities	Positives	e value
	L81/IL1403	AAK05849.1	119/119(100%)	119/119(100%)	6e-84		AAK05848.1	257/259(99%)	258/259(99%)	0.0		AAK05847.1	665/667(99%)	666/667(99%)	0.0
	L81/NZ9000	ADJ60910.1	95/119(80%)	109/119(91%)	2e-66		ADJ60908.1	252/259(97%)	256/259(98%)	0.0		No significant similarity found
	IL1403/NZ9000	AAK05849.1 / ADJ60910.1	95/119(80%)	109/119(91%)	2e-66		AAK05848.1 / ADJ60908.1	252/259(97%)	257/259(99%)	0.0
		YsaA (354 aa)					LlrG (223 aa)					KinG (291 aa)
	L. lactis	Accesion	Identities	Positives	e value		Accesion	Identities	Positives	e value		Accesion	Identities	Positives	e value
	L81/IL1403	AAK05846.1	353/354(99%)	353/354(99%)	0.0		AAK05845.1	223/223(100%)	223/223(100%)	2e-164		AAK05844.1	291/291(100%)	291/291(100%)	0.0
	L81/NZ9000	ADJ60907.1	317/354(90%)	337/354(95%)	0.0		ADJ60906.1	212/223(95%)	217/223(97%)	8e-157		ADJ60905.1	257/291(88%)	278/291(95%)	0.0
	IL1403/NZ9000	AAK05846.1 / ADJ60907.1	318/354(90%)	338/354(95%)	0.0		AAK05845.1 / ADJ60906.1	212/223(95%)	217/223(97%)	8e-157		AAK05844.1 / ADJ60905.1	257/291(88%)	278/291(95%)	0.0
